# Supplementary material
Source: Springer Nature journal article supplement (https://www.springermedizin.de/resource/supplementary/12865_2013_576_MOESM2_ESM.pdf/9428276)

**IL-10 HDM**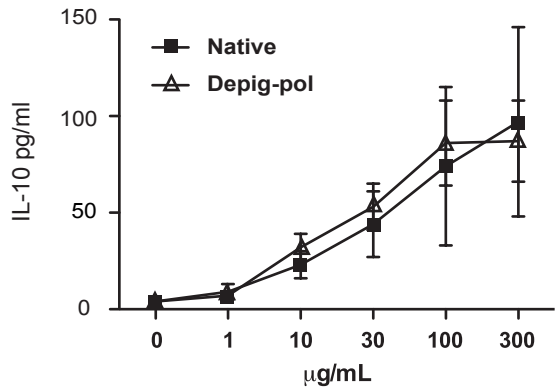**IL-5 HDM**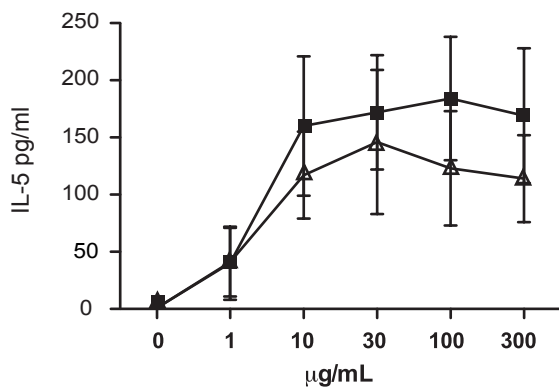**IFN- $\gamma$  HDM**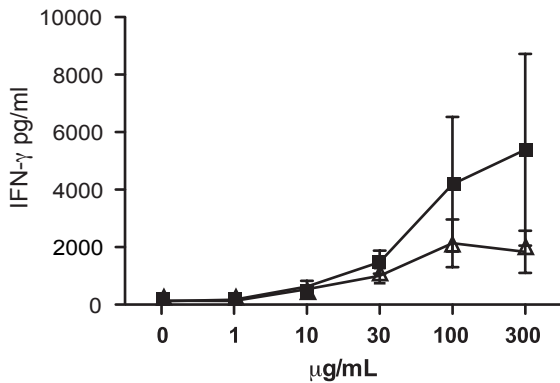**IL-17 HDM**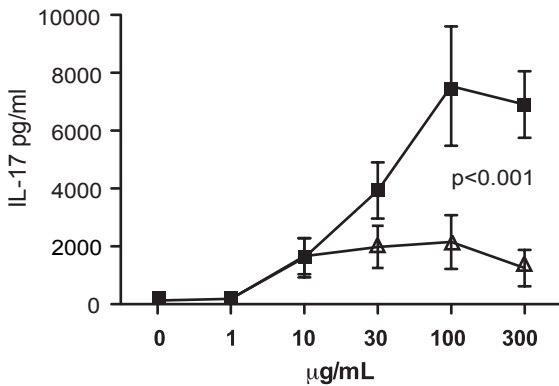

Supplement: MOESM2 [file 9428276]
